# Supplementary material for: High yield of ethyl valerate from the esterification of renewable valeric acid catalyzed by amino acid ionic liquids
Source: Royal Society of Chemistry journal article supplement (doi:10.1039/c3ra23034a), 2013-01-01
Supplement: c3ra23034a.pdf [file c3ra23034a.pdf]

Supporting Information

Belonging to the manuscript

**High Yield of Ethyl Valerate from the Esterification of  
Renewable Valeric Acid Catalyzed by Amino Acid Ionic  
Liquids**

Lin-Lin Dong, Ling He, Guo-Hong Tao,\* Changwei Hu\*

College of Chemistry, Sichuan University, Chengdu 610064, China

Email: [taogh@scu.edu.cn](mailto:taogh@scu.edu.cn), [gchem@scu.edu.cn](mailto:gchem@scu.edu.cn)

### **Geometry Coordinates**

B3LYP/6-311++G(d,p) optimized geometries (Å)

#### **GlyHSO<sub>4</sub>**

|   |             |             |             |
|---|-------------|-------------|-------------|
| N | -1.52247900 | 1.72958000  | 0.25264200  |
| C | -1.91715600 | 0.73077800  | -0.79333300 |
| C | -2.29208900 | -0.56884700 | -0.05214800 |
| O | -1.57726200 | -1.64251300 | -0.31310400 |
| O | -3.22054100 | -0.53806500 | 0.72044800  |
| H | -0.49196700 | 1.49784400  | 0.54392400  |
| H | -1.54624500 | 2.68501600  | -0.10190500 |
| H | -2.15961000 | 1.65617600  | 1.05066300  |
| H | -1.08178000 | 0.61781500  | -1.48034500 |
| H | -2.80755000 | 1.08337200  | -1.31324700 |
| H | -0.68067200 | -1.39705800 | -0.67915800 |
| S | 1.68524800  | 0.04534900  | -0.05159500 |
| O | 0.78264000  | -0.67801000 | -0.99598800 |
| O | 0.93555200  | 1.11976100  | 0.67915300  |
| O | 2.96043900  | 0.44967300  | -0.61538500 |
| O | 1.99251400  | -1.00758700 | 1.17556900  |
| H | 2.72994400  | -1.57345600 | 0.90443100  |

#### **AlaHSO<sub>4</sub>**

|   |             |             |             |
|---|-------------|-------------|-------------|
| N | 1.35594300  | -1.27419300 | 0.92668000  |
| C | 1.80015000  | -0.57436600 | -0.33642200 |
| C | 1.95443900  | 0.91765200  | 0.05496100  |
| O | 1.12920200  | 1.77659800  | -0.50527700 |
| O | 2.82023800  | 1.22434800  | 0.84048200  |
| H | 0.28903800  | -1.08717200 | 1.05840100  |
| H | 1.49409800  | -2.28296800 | 0.86016500  |
| H | 1.89527300  | -0.92246100 | 1.72246800  |
| H | 0.99284000  | -0.71261700 | -1.05401200 |
| H | 0.30649700  | 1.32617300  | -0.85363900 |
| S | -1.96060600 | -0.15791800 | -0.08675000 |
| O | -1.03507200 | 0.40811100  | -1.11362800 |
| O | -1.19101200 | -0.87274300 | 0.98236300  |
| O | -3.09894600 | -0.88007000 | -0.62678500 |
| O | -2.54318700 | 1.13113500  | 0.75507700  |
| H | -3.30065000 | 1.48559400  | 0.26720600  |
| C | 3.11558000  | -1.14563400 | -0.84944300 |
| H | 3.01380200  | -2.21063600 | -1.07758700 |
| H | 3.39983000  | -0.63564300 | -1.77177900 |
| H | 3.91655800  | -0.99918500 | -0.12240300 |

**ProHSO<sub>4</sub>**

|   |             |             |             |
|---|-------------|-------------|-------------|
| C | 1.44208400  | 1.68995500  | 0.04335300  |
| O | 0.37904200  | 2.37307100  | -0.33258100 |
| O | 2.34527800  | 2.16016600  | 0.69445100  |
| H | -0.35919200 | 1.78054800  | -0.65502700 |
| S | -2.25715000 | -0.29838000 | -0.12378000 |
| O | -1.50513300 | 0.65183000  | -0.99780100 |
| O | -1.32119600 | -1.09189600 | 0.73152800  |
| O | -3.28603900 | -1.06353000 | -0.80581800 |
| O | -3.00266500 | 0.63890600  | 1.01297700  |
| H | -3.80424800 | 1.00821300  | 0.61499000  |
| C | 1.49199800  | 0.20341500  | -0.36744500 |
| C | 2.84548700  | -0.29307200 | -0.86864000 |
| H | 0.69201200  | -0.04143000 | -1.06498400 |
| C | 2.77266400  | -1.80540800 | -0.60439500 |
| H | 3.64431100  | 0.17926100  | -0.29127000 |
| H | 2.99351200  | -0.05161400 | -1.92159400 |
| C | 2.05024700  | -1.91795400 | 0.74766200  |
| H | 2.19050200  | -2.30143200 | -1.38451500 |
| H | 3.75545500  | -2.27696800 | -0.57104600 |
| H | 1.36645700  | -2.76228700 | 0.81465500  |
| H | 2.74544700  | -1.95539700 | 1.58575500  |
| N | 1.24069900  | -0.63894200 | 0.87197900  |
| H | 1.53110200  | -0.11297700 | 1.69713000  |
| H | 0.18497700  | -0.82922900 | 0.92727500  |

**Deprotoned GlyHSO<sub>4</sub>**

|   |             |             |             |
|---|-------------|-------------|-------------|
| N | -1.05339500 | 1.56381000  | 0.43950100  |
| C | -1.77416700 | 0.85495600  | -0.63519900 |
| C | -2.49843300 | -0.37398800 | -0.07610200 |
| O | -1.75125800 | -1.44260900 | 0.16750900  |
| O | -3.69407000 | -0.36540700 | 0.14230100  |
| H | 0.41341900  | 0.60865800  | 1.39272700  |
| H | -0.29966200 | 2.11108700  | 0.02969700  |
| H | -1.67767500 | 2.17322300  | 0.95614300  |
| H | -1.02881600 | 0.53999700  | -1.36689200 |
| H | -2.52716700 | 1.47679900  | -1.13079600 |
| H | -0.78670300 | -1.31077600 | -0.08425900 |
| S | 1.75998300  | -0.11720800 | -0.10620900 |
| O | 0.74922500  | -1.13415000 | -0.55702000 |
| O | 1.31447800  | 0.22118700  | 1.45876100  |

|   |            |             |             |
|---|------------|-------------|-------------|
| O | 1.60707600 | 1.16274100  | -0.84057700 |
| O | 3.11907900 | -0.63628100 | 0.01578000  |

#### Deprotoned AlaHSO<sub>4</sub>

|   |             |             |             |
|---|-------------|-------------|-------------|
| N | -0.96535800 | 1.03511500  | 1.01794700  |
| C | -1.64615100 | 0.60895800  | -0.22413300 |
| C | -2.15702200 | -0.82977400 | -0.00805100 |
| O | -1.26892300 | -1.79850500 | -0.18248700 |
| O | -3.30273300 | -1.06547400 | 0.32007800  |
| H | 0.68254300  | 0.06026700  | 1.53726600  |
| H | -0.34555900 | 1.81372200  | 0.80403100  |
| H | -1.64368300 | 1.32297700  | 1.71722700  |
| H | -0.86850400 | 0.58109700  | -0.98910100 |
| H | -0.35602000 | -1.45785600 | -0.43413300 |
| S | 2.00578600  | 0.02115200  | -0.14954800 |
| O | 1.11090500  | -0.94436700 | -0.87652800 |
| O | 1.62502500  | -0.20830600 | 1.45176300  |
| O | 1.63668600  | 1.42802800  | -0.43989200 |
| O | 3.42639100  | -0.30754000 | -0.22730200 |
| C | -2.77310300 | 1.54321000  | -0.66658000 |
| H | -2.38018500 | 2.55446200  | -0.80759700 |
| H | -3.21224200 | 1.20956800  | -1.61150300 |
| H | -3.57256500 | 1.56648200  | 0.07847000  |

#### Deprotoned ProHSO<sub>4</sub>

|   |             |             |             |
|---|-------------|-------------|-------------|
| C | 1.60523100  | 1.55948700  | 0.02462100  |
| O | 0.49107700  | 2.26389100  | 0.16641800  |
| O | 2.68489200  | 2.00205000  | 0.36415600  |
| H | -0.33925200 | 1.77932700  | -0.14786000 |
| S | -2.37077200 | -0.07522900 | 0.00277900  |
| O | -1.63997300 | 1.04323900  | -0.69422300 |
| O | -1.72236000 | -1.45591400 | -0.65437400 |
| O | -3.78738300 | -0.15825700 | -0.33933400 |
| O | -2.01779900 | -0.12593700 | 1.44059900  |
| C | 1.41951100  | 0.14412800  | -0.56883100 |
| C | 2.75324300  | -0.51119100 | -0.99502800 |
| H | 0.71452000  | 0.22924000  | -1.39924400 |
| C | 2.83705700  | -1.83266800 | -0.19959700 |
| H | 3.57249000  | 0.15657800  | -0.72465100 |
| H | 2.78918700  | -0.67616700 | -2.07382400 |
| C | 1.95237600  | -1.55981400 | 1.01904000  |
| H | 2.41544300  | -2.66086500 | -0.77698700 |
| H | 3.86240900  | -2.09550200 | 0.07257000  |

|   |             |             |             |
|---|-------------|-------------|-------------|
| H | 1.57406300  | -2.46881100 | 1.49463300  |
| H | 2.51035000  | -0.98380300 | 1.77348200  |
| N | 0.84258200  | -0.79974500 | 0.43149700  |
| H | 0.24549800  | -0.34882200 | 1.12407100  |
| H | -0.78256000 | -1.48150500 | -0.35431500 |
